# Supplementary material for: Nanofluidic chips for cryo-EM structure determination from picoliter sample volumes
Source: eLife journal article supplement (doi:10.7554/elife.72629), 2021-12-09
Supplement: supp1 [file elife-72629-supp1-v1.pdf]

**Appendix 0 Table 1.** Data collection and refinement statistics for collected datasets

|                                                     | <b>ApoFtn<br/>EMD-12901</b>                    | <b>TMV<br/>EMD-12903</b>                               | <b>T20S<br/>EMD-12915</b>                              |
|-----------------------------------------------------|------------------------------------------------|--------------------------------------------------------|--------------------------------------------------------|
| Specimen                                            | 3 cryoChips<br>filled with 3.4 mg/mL<br>ApoFtn | 2 cryoChips<br>filled with 1.1 mg/mL<br>TMV            | 1 cryoChip<br>filled with 1.4 mg/mL<br>T20S proteasome |
| Microscope                                          | TFS Titan Krios                                | JEOL 3200-FSC                                          | JEOL 3200-FSC                                          |
| Voltage (kV)                                        | 300                                            | 300                                                    | 300                                                    |
| Detector                                            | K2-XP                                          | K2-XP                                                  | K2-XP                                                  |
| Energy filter                                       | Gatan BioQuantum                               | In-column omega filter                                 | In-column omega filter                                 |
| Number of movies<br>(vitreous/crystalline)          | 945 (815 / 130)                                | 82 (43 / 39)                                           | 121 (91/30)                                            |
| Pixel size (Å)                                      | 0.8127                                         | 1.288                                                  | 1.288                                                  |
| Electron exposure (e <sup>-</sup> /Å <sup>2</sup> ) | 63                                             | 59.7                                                   | 59.7                                                   |
| # of frames                                         | 90                                             | 73                                                     | 73                                                     |
| Exposure time (s)                                   | 9                                              | 10.95                                                  | 10.95                                                  |
| Defocus range (µm)                                  | -1 to -2                                       | -1 to -3.5                                             | -2 to -4                                               |
| Symmetry imposed                                    | O                                              | helical<br>rotation: 22.036°,<br>helical rise: 1.415 Å | D7                                                     |
| Map sharpening B-factor (Å <sup>2</sup> )           | -88.3                                          | -65.8                                                  | -353.5                                                 |
| Final number of particles<br>/ asymmetric units     | 21,238 / 509,712                               | 14,238 / 284,760                                       | 5750 / 80,500                                          |
| Final map resolution (Å)                            | 3.0                                            | 3.7                                                    | 5.4                                                    |
| Map resolution range (Å)                            | 2.9-3.5                                        | 3.5-4.3                                                | 5.2-6.5                                                |
| EMPIAR                                              | <a href="#">10708</a>                          | <a href="#">10708</a>                                  | <a href="#">10708</a>                                  |
