# Supplementary material for: Nanofluidic chips for cryo-EM structure determination from picoliter sample volumes
Source: eLife journal article supplement (doi:10.7554/elife.72629), 2021-12-09
Supplement: supp2 [file elife-72629-supp2-v1.pdf]

**Appendix 0 Table 2.** Data collection and refinement statistics for reference datasets on holey carbon grids

|                                                     | <b>ApoFtn-QF</b>                            | <b>T20S-QF</b>                            |
|-----------------------------------------------------|---------------------------------------------|-------------------------------------------|
| Specimen                                            | Quantifoil R2/1 300mesh<br>3.4 mg/mL ApoFtn | Quantifoil R2/1 300mesh<br>1.4 mg/mL T20S |
| Microscope                                          | TFS Titan Krios                             | JEOL 3200-FSC                             |
| Voltage (kV)                                        | 300                                         | 300                                       |
| Detector                                            | K2-XP                                       | K2-XP                                     |
| Energy filter                                       | Gatan BioQuantum                            | In-column omega filter                    |
| Number of movies                                    | 276                                         | 879                                       |
| Pixel size (Å)                                      | 0.8127                                      | 1.288                                     |
| Electron exposure (e <sup>-</sup> /Å <sup>2</sup> ) | 63                                          | 59.7                                      |
| # of frames                                         | 90                                          | 93                                        |
| Exposure time (s)                                   | 9                                           | 10.95                                     |
| Defocus range (µm)                                  | -1 to -2                                    | -2 to -4                                  |
| Symmetry imposed                                    | O                                           | D7                                        |
| Map sharpening B-factor (Å <sup>2</sup> )           | -73.6                                       | -175.2                                    |
| Final number of particles<br>/ asymmetric units     | 21,683 / 520,392                            | 279,332 / 3,910,648                       |
| Final map resolution (Å)                            | 2.4                                         | 3.2                                       |
