# Supplementary material for: Nanofluidic chips for cryo-EM structure determination from picoliter sample volumes
Source: eLife journal article supplement (doi:10.7554/elife.72629), 2021-12-09
Supplement: supp3 [file elife-72629-supp3-v1.pdf]

**Appendix 0 Table 3.** Model refinement statistics for ApoFtn atomic model.

|                                    | <b>ApoFtn<br/>7ohf</b> |
|------------------------------------|------------------------|
| Initial model used<br>(PDB code)   | 2x17                   |
| Model resolution<br>(Å, FSC = 0.5) | 3.3                    |
| CC mask                            | 0.776                  |
| <b>Model composition</b>           |                        |
| Nonhydrogen atoms                  | 24 x 1399              |
| Protein residues                   | 24 x 169               |
| <b>RMSD</b>                        |                        |
| Bond lengths (Å)                   | 0.008                  |
| Bond angles (°)                    | 0.864                  |
| <b>Validation</b>                  |                        |
| MolProbity score                   | 0.88                   |
| Clashscore                         | 1.41                   |
| Rotamer outliers (%)               | 1                      |
| <b>Ramachandran plot</b>           |                        |
| Favored (%)                        | 99.4                   |
| Allowed (%)                        | 0.6                    |
| Disallowed (%)                     | 0                      |
