# Supplementary material for: Nanofluidic chips for cryo-EM structure determination from picoliter sample volumes
Source: eLife journal article supplement (doi:10.7554/elife.72629), 2021-12-09
Supplement: supp4 [file elife-72629-supp4-v1.pdf]

**Appendix 0 Table 4.** Data and 3D reconstruction parameters of reference datasets

| EMPIAR | Protein | Support film                   | Resolution | B-factor               | # particles | Pixel size (Å) | Acq. scheme | Ref.                           |
|--------|---------|--------------------------------|------------|------------------------|-------------|----------------|-------------|--------------------------------|
| 10200  | ApoF    | QF-R2/2<br>holey carbon        | 1.65 Å     | 66 Å <sup>2</sup> *    | 426,450     | 0.814          | multi-shot  | <i>Zivanov et al. (2018)</i>   |
| 10272  | ApoF    | Ultrafoil-R0.6/1<br>+ graphene | 2.14 Å     | 54 Å <sup>2</sup> **   | 41,202      | 0.649          | single-shot | <i>Naydenova et al. (2019)</i> |
| 10306  | TMV     | CF-2/2-2C<br>holey carbon      | 1.90 Å     | 41 Å <sup>2</sup> **   | 20,000      | 0.638          | multi-shot  | <i>Weis et al. (2019)</i>      |
| 10389  | Urease  | QF-R1.2/1.3<br>holey carbon    | 1.98 Å     | 38 Å <sup>2</sup> **   | 119,020     | 0.639          | both        | <i>Righetto et al. (2020)</i>  |
| 10708  | ApoFtn  | cryoChip<br>SiN <sub>x</sub>   | 2.99 Å     | 88.3 Å <sup>2</sup> ** | 21,238      | 0.813          | multi-shot  | this paper                     |

\*B-factor from ResLog plot. \*\*B-factors as determined from Guinier plot.  
ApoF: horse spleen apoferritin; ApoFtn: *P. furiosus* apoferritin
